# Supplementary material for: Physical model for temperature-dependent dielectric properties of anisotropic nematic liquid crystals
Source: Royal Society of Chemistry journal article supplement (doi:10.1039/c8cp01577e), 2018-01-01
Supplement: c8cp01577e1.pdf [file c8cp01577e1.pdf]

## Supplementary Information

-for-

### Physical model for temperature-dependent dielectric properties of anisotropic nematic liquid crystals

Amid Ranjkesh,<sup>a</sup> Mohammad Moghadam,<sup>b</sup> Jun-Chan Choi,<sup>a</sup> Byeonggon Kim,<sup>a</sup>

JeongHoon Ko,<sup>a,c</sup> Mohammad Sadegh Zakerhamidi,<sup>d</sup> Hak-Rin Kim<sup>a\*</sup>

<sup>a</sup>*School of Electronics Engineering, Kyungpook National University, Daegu 41566, Republic of Korea;*

<sup>b</sup>*Faculty of Technology and Engineering East of Guilan, University of Guilan, Rudsar, Iran;*

<sup>c</sup>*LG Display Co., Ltd., Gumi, Gyeongsangbuk-do 39402, Republic of Korea;*

<sup>d</sup>*Research Institute for Applied Physics and Astronomy, University of Tabriz, Tabriz, Iran*

[\\*rineey@knu.ac.kr](mailto:*rineey@knu.ac.kr)

### S1. Four-parameter model for $\varepsilon_e(T)$ and $\varepsilon_o(T)$

When we follow the conventional four-parameter refractive index model in deriving a physical analytic model for the temperature-dependent dielectric parameters of nematic liquid crystals (NLCs), the temperature-dependent extraordinary and ordinary dielectric constants–  $\varepsilon_e$  and  $\varepsilon_o$ , respectively– can be written by employing eqn (5) as follows, with similar formulas to eqn (7) and (8):

$$\varepsilon_e(T) = A + BT + \frac{2}{3}(\Delta\varepsilon)_o \left(1 - \frac{T}{T_{NI}}\right)^{\lambda_\varepsilon} \quad (S1)$$

$$\varepsilon_o(T) = A + BT - \frac{1}{3}(\Delta\varepsilon)_o \left(1 - \frac{T}{T_{NI}}\right)^{\lambda_\varepsilon} \quad (S2)$$

where  $(\Delta\varepsilon)_o$  is defined as follows similar to eqn (6).

$$\Delta\varepsilon = (\Delta\varepsilon)_o \left(1 - \frac{T}{T_{NI}}\right)^{\lambda_\varepsilon} \quad (S3)$$

In this case, the mean dielectric value of the temperature-dependent NLC can be expressed with eqn (S1) and (S2) as follows, which also have a similar form to eqn (5).

$$\langle \varepsilon(T) \rangle = A + BT \quad (S4)$$

The analytic curves for the temperature-dependent mean dielectric values and dielectric constants obtained by the four-parameter dielectric models are co-plotted as the dotted lines with the fitting results obtained by the six-parameter dielectric models in Figs. 4 and 5. The physical parameters extracted from the four-parameter dielectric model of eqn (S1), (S2), and (S4) for the four fluorinated NLCs are listed in Table S1.

**Table S1.** Fitting parameters for the four fluorinated NLCs, where the parameters are obtained by using the four-parameter dielectric model.

| LC material                          | $A_e$      | $B_e (\times 10^{-2} \text{K}^{-1})$ | $(\Delta\varepsilon)_0$ | $\lambda_e$ |
|--------------------------------------|------------|--------------------------------------|-------------------------|-------------|
| 3PBC <sup>3,5</sup> F <sub>2</sub>   | 5.95±0.02  | − 0.68±0.04                          | 5.25±0.03               | 0.224±0.02  |
| 5PBC <sup>3,5</sup> F <sub>2</sub>   | 5.79±0.03  | − 0.63±0.05                          | 4.46±0.05               | 0.202±0.03  |
| 3PBC <sup>3,4,5</sup> F <sub>3</sub> | 18.40±0.01 | − 3.27±0.01                          | 15.45±0.09              | 0.238±0.02  |
| 5PBC <sup>3,4,5</sup> F <sub>3</sub> | 15.62±0.02 | − 2.67±0.03                          | 14.12±0.1               | 0.230±0.04  |

## S2. Fitting results of six-parameter dielectric model for aminobenzonitrile NLCs

The fitting accuracy of the six-parameter dielectric model derived in our work was checked by applying our model to different sets of NLCs. In this evaluation, three types of aminobenzonitrile NLCs<sup>1</sup> were used as shown in Fig. S1. Their fitting results for the temperature-dependent dielectric constants and dielectric anisotropies are shown in Fig. S2 and S3, respectively. The fitting parameter values obtained by the six-parameter dielectric models are listed in Table S2.

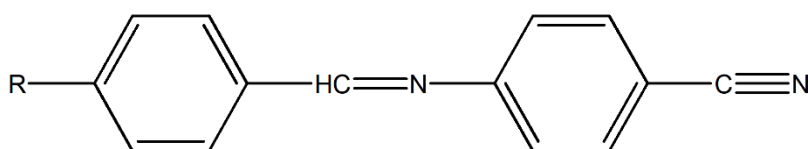

$$R_1 = n\text{-C}_4\text{H}_9\text{-O-} \quad (T_{NI} = 370.75 \text{ K}),$$

$$R_2 = n\text{-C}_3\text{H}_7\text{-O-} \quad (T_{NI} = 374.05 \text{ K}),$$

$$R_3 = n\text{-C}_7\text{H}_{15}\text{-COO} \quad (T_{NI} = 383.62 \text{ K}).$$

**Fig. S1** Chemical structures of three types of aminobenzonitrile NLCs<sup>1</sup> and their phase transition temperatures ( $T_{NI}$ ).

**Table S2.** Fitting parameters of  $\varepsilon^*$ ,  $A_\varepsilon$ ,  $B_\varepsilon$ ,  $T^*$ ,  $(\Delta\varepsilon)_o$  and  $\lambda_\varepsilon$  for three types of aminobenzonitrile NLCs, which were extracted from the temperature-dependent average dielectric constants<sup>1</sup>  $\langle\varepsilon(T)\rangle$  and dielectric anisotropies<sup>1</sup>  $(\Delta\varepsilon(T))$  using eqn (14) and (15), respectively, to obtain the six-parameter dielectric permittivity models of eqn (16) and (17).

| LC             | $\varepsilon^*$ | $A_\varepsilon (\times 10^{-3} \text{ K}^{-1})$ | $B_\varepsilon (\text{K}^{-0.5})$ | $(\Delta\varepsilon)_o$ | $\lambda_\varepsilon$ | $T^* (\text{K})$ |
|----------------|-----------------|-------------------------------------------------|-----------------------------------|-------------------------|-----------------------|------------------|
| R <sub>1</sub> | 13.9±0.002      | - 0.4±0.2                                       | 0.095±0.003                       | 34.27±0.07              | 0.25±0.01             | 373.6±0.02       |
| R <sub>2</sub> | 12.4±0.004      | - 0.1±0.1                                       | 0.090±0.001                       | 24.3±0.09               | 0.18±0.02             | 374.01±0.03      |
| R <sub>3</sub> | 10.8±0.003      | - 0.5±0.3                                       | 0.099±0.002                       | 17.8±0.10               | 0.16±0.03             | 383.6±0.04       |

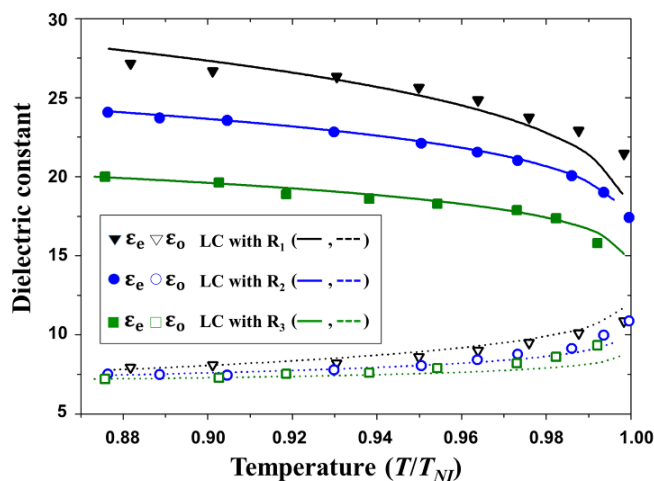

**Fig. S2** Temperature-dependent dielectric constants ( $\epsilon_e(T)$ ,  $\epsilon_o(T)$ ) of the aminobenzonitrile NLCs. The experimental data<sup>1</sup> and the fitted curves are presented as symbols and solid lines, respectively. The fitting curves are obtained with the six-parameter dielectric model of eqn (16) and (17) and the physical parameters listed in Table S2.

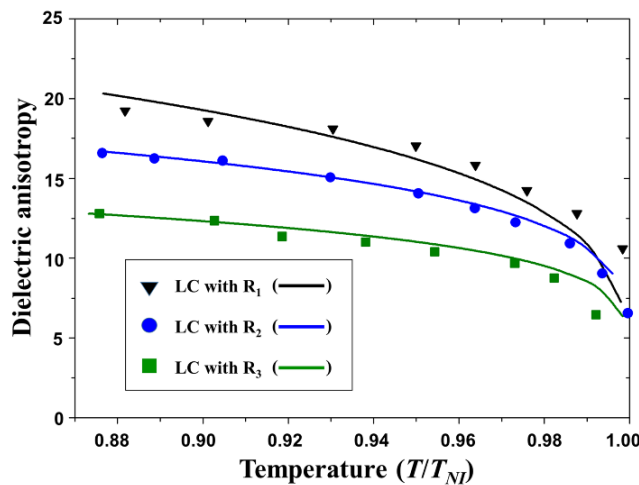

**Fig. S3** Temperature-dependent dielectric anisotropy ( $\Delta\epsilon(T)$ ) of the aminobenzonitrile NLCs, where the symbols and solid lines represent the experimental data<sup>1</sup> and the fitted curves obtained by using eqn (15), respectively.

**S3. Fitting results of threshold voltages and splay elastic constants obtained from the four-parameter dielectric model using four fluorinated NLCs**

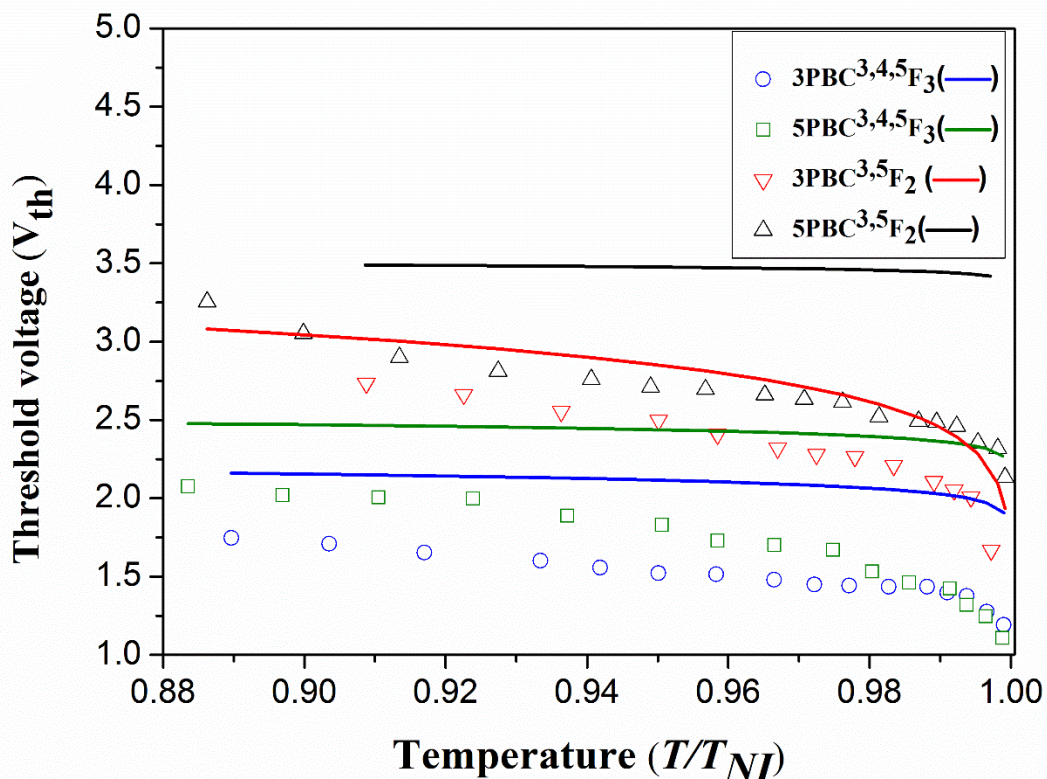

**Fig. S4** Temperature-dependent threshold voltage ( $V_{th}$ ) properties of the four fluorinated NLCs, where the experimental data and analytic curves are presented as symbols and solid lines, respectively. The analytic curves were obtained using the equation  $V_{th} = (V_{th})_o ((1-T/T_{NI})^{\beta - \lambda_{\epsilon}/2})$ , where the  $\beta$  values were obtained from the Haller approximation method shown in eqn (6) and the  $\lambda_{\epsilon}$  values listed in Table S1 were used.

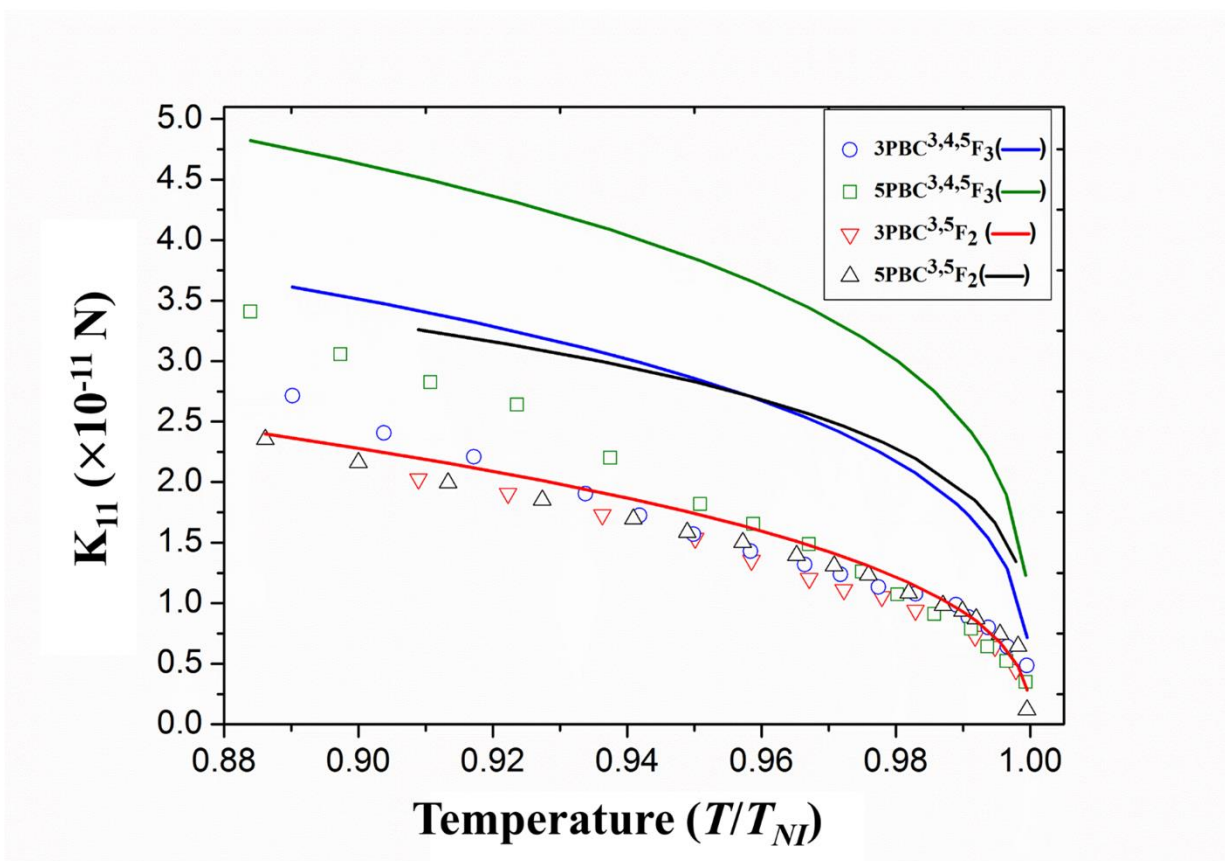

**Fig. S5** Temperature-dependent splay elastic constant ( $K_{11}$ ) properties of the four fluorinated NLCs, where the experimental data and analytic curves are presented as the symbols and solid lines, respectively. The analytic curves were obtained using the equation  $K_{11}=(K_{11})_0((1-T/T_{NI})^{2\beta})$  and the physical parameters are based on the four-parameter refractive index model.

## References

- 1 M. Schadt, *J. Chem. Phys.*, 1972, **56**, 1494-1497.
